# Supplementary material for: Constructing porous frameworks from one-dimensional cobalt–oxygen clusters and pyridinedicarboxylate ligands adopting two rare coordination modes
Source: Royal Society of Chemistry journal article supplement (doi:10.1039/b715808d), 2008-01-01

Electronic Supplementary Material for CrystEngComm  
This journal is © The Royal Society of Chemistry 2008

## **Constructing porous frameworks from one-dimensional cobalt–oxygen clusters and pyridinedicarboxylate ligands adopting two rare coordination modes**

**Zhi-Gang Li, Guan-Hua Wang, Heng-Qing Jia, Ning-Hai Hu,\* and Jing-Wei Xu\***

*Changchun Institute of Applied Chemistry, Chinese Academy of Sciences,  
Changchun 130022, P. R. China. Fax: 86 431 85685653; E-mail: hunh@ciac.jl.cn.*

### **Supplementary Information**

**Figure S1.** Various coordination modes of 2,4-pydc ligand summarized from Cambridge Structural Database.

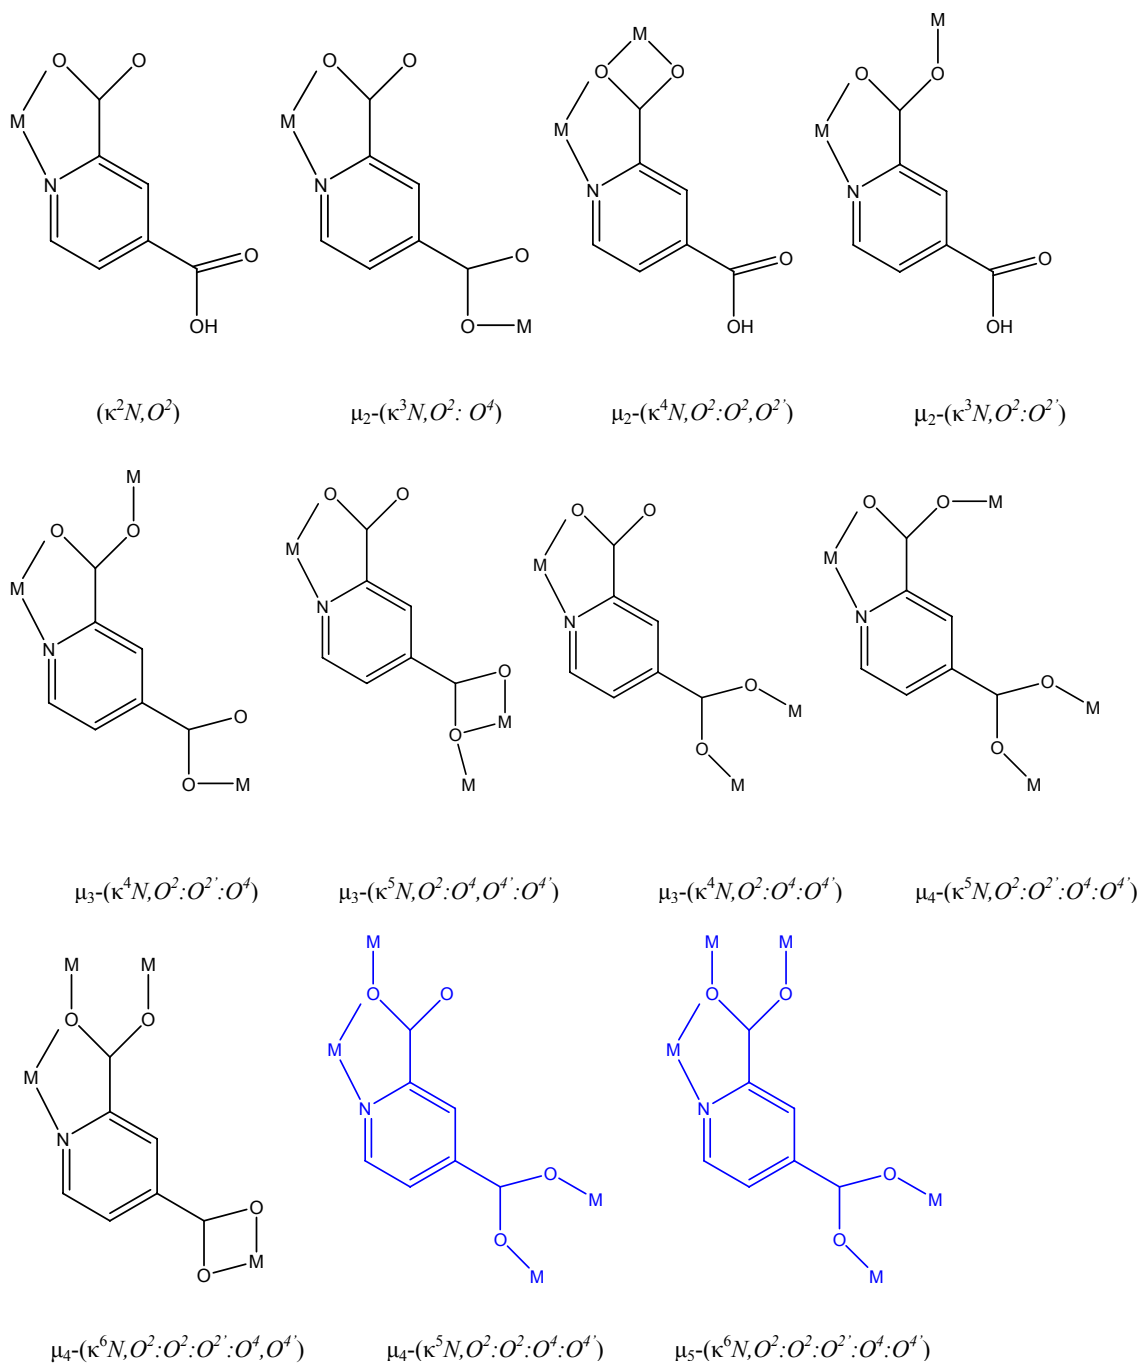

(This work)

**Figure S2.** FT-IR spectroscopy of **1**.

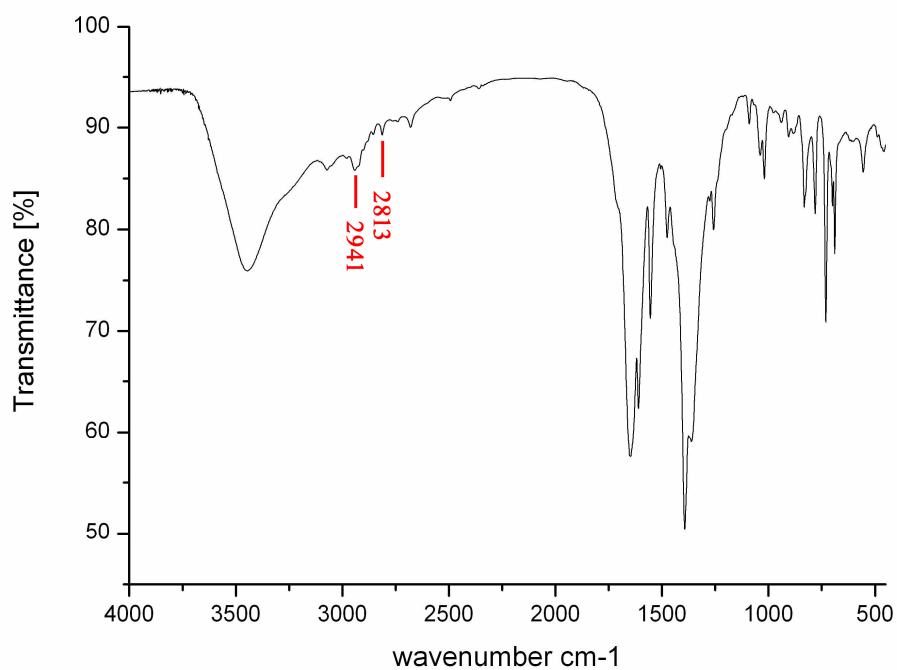

**Figure S3.** TGA curves of **1**.

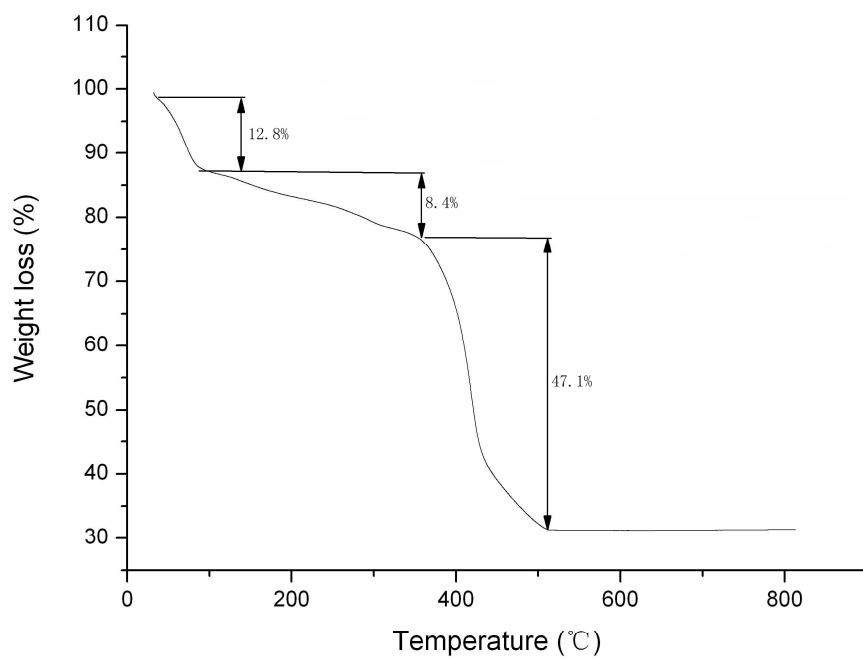

**Figure S4.** XPRD patterns of (a) the simulated, (b) as-synthesized, and (c) evacuated at 70 °C for 24 h for **1**.

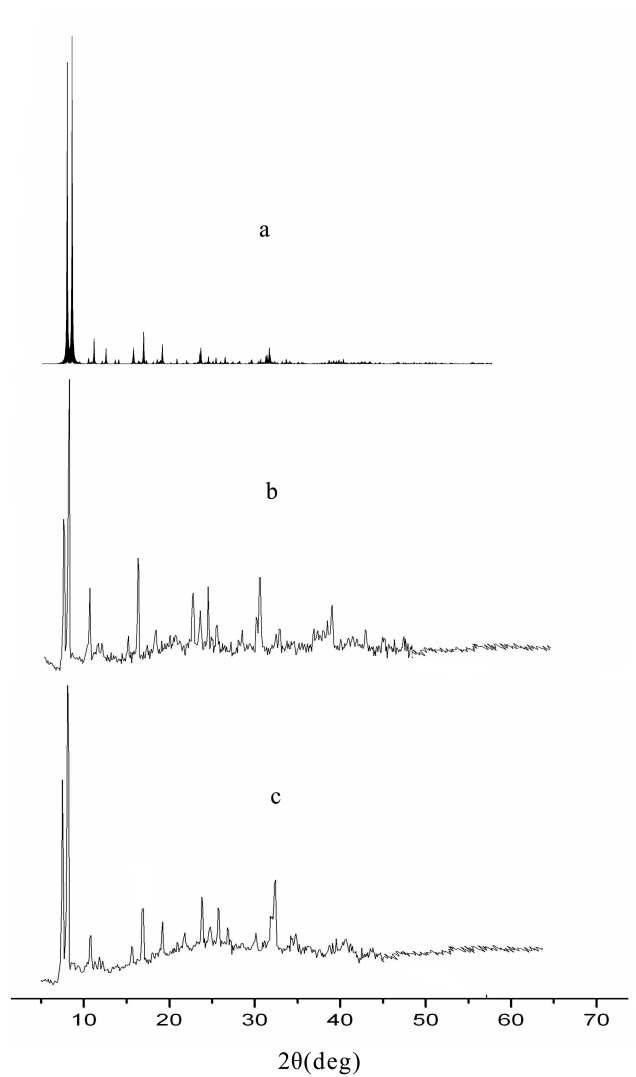

**Figure S5.** Perspective view of the 3-D framework in **2**, showing square channels along the *c* direction.

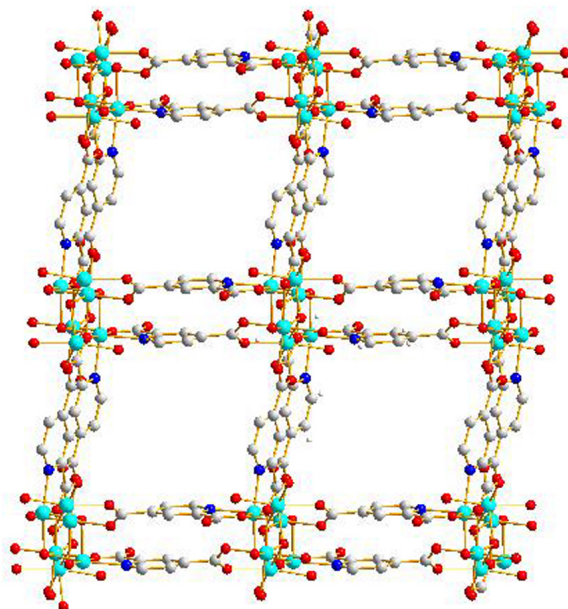

Supplement: b715808d.pdf [file b715808d.pdf]
